# Supplementary material for: Anti-inflammatory chemical constituents of Flos Chrysanthemi Indici determined by UPLC-MS/MS integrated with network pharmacology
Source: Royal Society of Chemistry journal article supplement (doi:10.1039/d0fo01000f), 2020-01-01
Supplement: d0fo01000f1.pdf [file d0fo01000f1.pdf]

1 **Anti-inflammation chemical constituents of *Flos Chrysanthemi Indici* determined**  
2 **by UPLC-MS/MS integrated with network pharmacology**

3 Correspondence to: Zhong-Mei Zou and Hong-Mei Jia †Institute of Medicinal Plant  
4 Development, Chinese Academy of Medical Sciences and Peking Union Medical  
5 College, Beijing 100193, China  
6 Tel (Fax): +86-10-57833095  
7 E-mail: z mzou@implad.ac.cn; hmjia@implad.ac.cn

8

9 Dong Tian<sup>a</sup>, Yong Yang<sup>c</sup>, Meng Yu<sup>a</sup>, Zheng-Zhou Han<sup>b</sup>, Min Wei<sup>b</sup>, Hongwu Zhang<sup>a</sup>,  
10 Hong-Mei Jia<sup>a, \*</sup>, and Zhong-Mei Zou <sup>a,\*</sup>

11 <sup>a</sup> Institute of Medicinal Plant Development, Chinese Academy of Medical Sciences and Peking  
12 Union Medical College, Beijing 100193, China

13 <sup>b</sup> China Resources Sanjiu Medical & Pharmaceutical Co., Ltd., Shenzhen 518110, China

14 <sup>c</sup> Guizhou University of Traditional Chinese Medicine, Huaxi District, Guiyang City, Guizhou  
15 563000, China

16

17

18

19

20

21

22

23

24

25

26

27

28

29

30

31

32

33

34

35

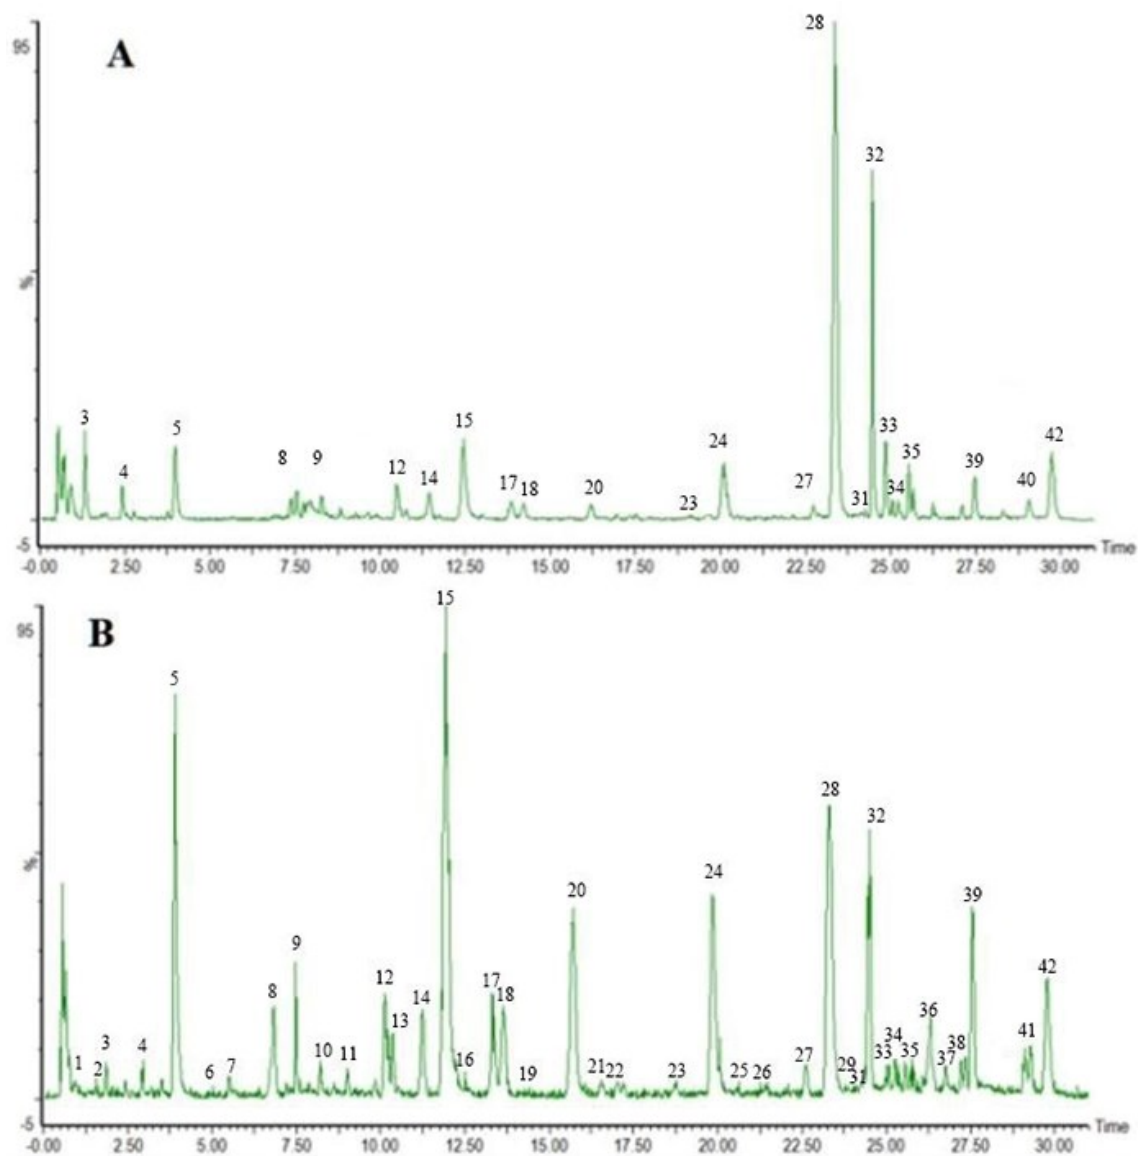

36

37 **Fig. S1** Typical UPLC-Q-TOF/MS base peak intensity (BPI) chromatograms of FCI in positive  
38 ion mode (A) and negative ion mode (B).

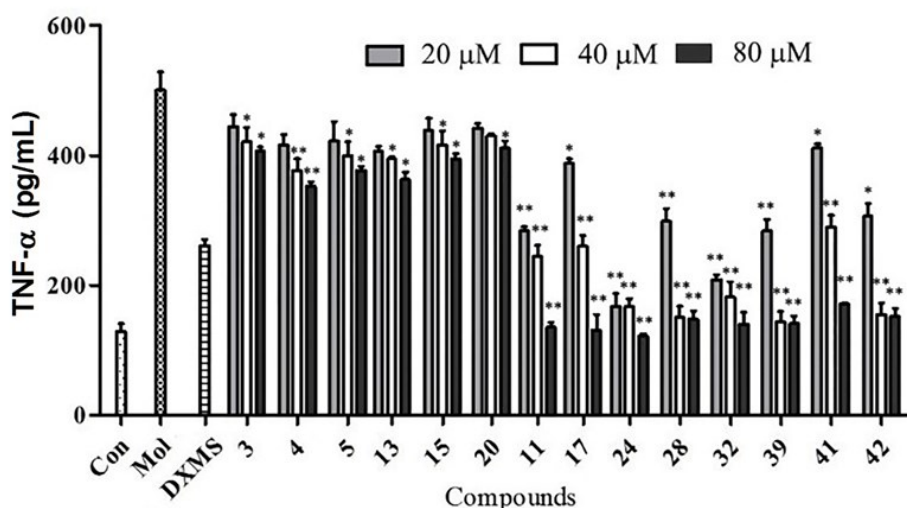

39

40 **Fig. S2** Effect of 14 key constituents on the production of TNF- $\alpha$  in LPS activated RAW264.7  
 41 macrophages. Data were represented as mean  $\pm$  S.D. with three independent experiments (n = 3). \*  
 42 Means P < 0.05, \*\* means P < 0.01 compared with the only LPS treated group. Con: Control group;  
 43 Mol: LPS treated group; DXMS: dexamethasone treated group.

44

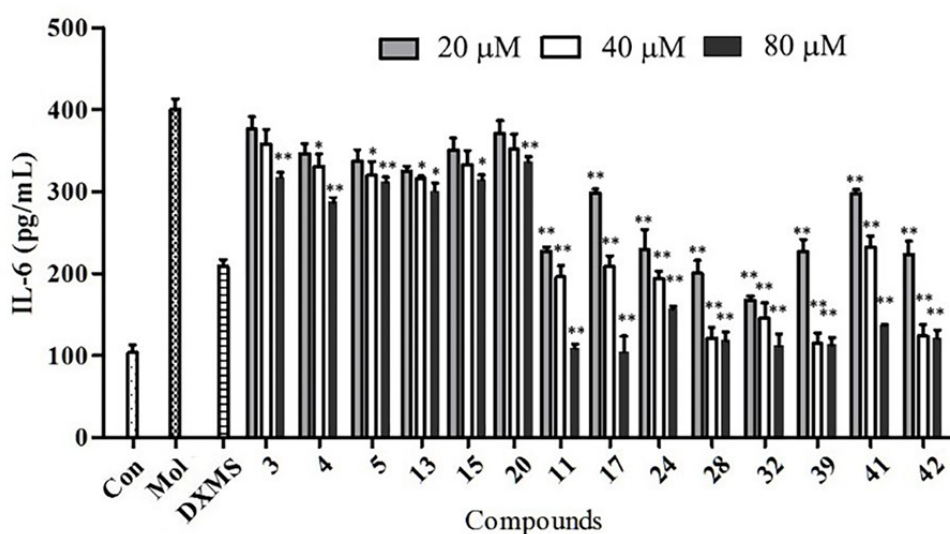

45

46

47 **Fig. S3** Effect of 14 key constituents on the production of IL-6 in LPS activated RAW264.7  
 48 macrophages. Data were represented as mean  $\pm$  S.D. with three independent experiments (n = 3). \*  
 49 Means P < 0.05, \*\* means P < 0.01 compared with the only LPS treated group. Con: Control group;  
 50 Mol: LPS treated group; DXMS: dexamethasone treated group.

51

52

**Tab. S1** The information of 97 targets related to anti-inflammatory of FCI

| No. | Target  | Full Name                                                | Uniprot ID |
|-----|---------|----------------------------------------------------------|------------|
| 1   | ABCG2   | ATP-binding cassette sub-family G member 2               | Q9UNQ      |
| 2   | ADA     | Adenosine Deaminase                                      | P00813     |
| 3   | ADK     | Adenylate kinase                                         | P55263     |
| 4   | ADORA1  | Adenosine receptor A1                                    | P30542     |
| 5   | ADORA2A | Adenosine A2a receptor                                   | P29274     |
| 6   | ADORA2B | Adenosine receptor A2b                                   | P29275     |
| 7   | ADORA3  | Adenosine A3 receptor                                    | P0DMS8     |
| 8   | ADRB2   | Adrenergic receptor beta-2                               | P07550     |
| 9   | AKR1B10 | Aldo-keto reductase family 1 member B10                  | O60218     |
| 10  | ALOX12  | Arachidonate 12-lipoxygenase,                            | P18054     |
| 11  | ALOX15  | Arachidonate 15-lipoxygenase                             | P16050     |
| 12  | ALOX5   | Arachidonate 5-lipoxygenase                              | P09917     |
| 13  | AMPD3   | AMP deaminase 3                                          | Q01432     |
| 14  | APOH    | Apolipoprotein H                                         | P02749     |
| 15  | AR      | Androgen recepto                                         | P21730     |
| 16  | BACE1   | Beta-secretase 1                                         | P56817     |
| 17  | CCND1   | G1/S-specific cyclin-D1                                  | P24385     |
| 18  | CCND3   | G1/S-specific cyclin-D3                                  | P30281     |
| 19  | CDK6    | Cyclin-dependent kinase 6                                | Q00534     |
| 20  | CDKN2A  | Cyclin-dependent kinase inhibitor 2A                     | P42771     |
| 21  | CMA1    | Cyclopropane mycolic acid synthase 1                     | P23946     |
| 22  | COL1A1  | Collagen alpha-1chain                                    | P02452     |
| 23  | CSNK2A1 | Casein kinase II subunit alpha, CK II alpha              | P68400     |
| 24  | CTSG    | Cathepsin G                                              | P08311     |
| 25  | DLG4    | Disks large homolog 4                                    | P78352     |
| 26  | DNMT1   | DNA (cytosine-5)-methyltransferase 1                     | P26358     |
| 27  | DOT1L   | DOT1-like protein                                        | Q8TEK3     |
| 28  | EGFR    | Epidermal growth factor receptor                         | P00533     |
| 29  | ENG     | Endoglin                                                 | P17813     |
| 30  | EPX     | Eosinophil Peroxidase                                    | P11678     |
| 31  | ESR1    | Estrogen Receptor 1                                      | P03372     |
| 32  | F2R     | Coagulation factor II thrombin receptor                  | P26824     |
| 33  | F3      | Coagulation Factor III, Tissue Factor                    | P13726     |
| 34  | FASLG   | Fas ligand intracellular domain                          | P48023     |
| 35  | FGF2    | Fibroblast Growth Factor 2                               | P15655     |
| 36  | FGFR1   | Fibroblast growth factor receptor 1                      | P11362     |
| 37  | FLT1    | Fms-like tyrosine kinase 1                               | P17948     |
| 38  | GLO1    | Glycolate oxidase 1                                      | Q10CE4     |
| 39  | GRIN2B  | Glutamate ionotropic receptor NMDA type subunit 2B       | Q13224     |
| 40  | HDAC1   | Histone deacetylase 1                                    | P56517     |
| 41  | IKBKB   | Inhibitor of nuclear factor kappa B kinase subunit gamma | Q9Y6K9     |
| 42  | IL10    | Interleukin-10                                           | Q13651     |
| 43  | IL2     | Interleukin-2                                            | P04351     |
| 44  | IL6     | Interleukin-6                                            | P22273     |
| 45  | INSR    | Insulin receptor                                         | P06213     |

---

|    |         |                                                    |        |
|----|---------|----------------------------------------------------|--------|
| 46 | P2RY12  | P2Y purinoceptor 12                                | Q9H244 |
| 47 | P2RY2   | P2Y purinoceptor 2                                 | P35383 |
| 48 | IRS1    | Insulin receptor substrate 1                       | P35570 |
| 49 | PRKCD   | Protein kinase C delta type                        | P28867 |
| 50 | ITGAM   | Integrin Subunit Alpha M                           | P11215 |
| 51 | ITPR1   | Inositol 1,4,5-trisphosphate receptor type 1       | P11881 |
| 52 | KDR     | Kinase insert domain receptor                      | P35968 |
| 53 | PRKCQ   | Protein kinase C theta type                        | Q04759 |
| 54 | LTA4H   | Leukotriene A-4 hydrolase                          | P24527 |
| 55 | MAG     | Myelin-associated glycoprotein                     | P07722 |
| 56 | MAOA    | Monoamine oxidase A                                | P21397 |
| 57 | MAPK14  | Mitogen-activated protein kinase 14                | P47811 |
| 58 | SCN4A   | Sodium channel protein type 4 subunit alpha        | P10636 |
| 59 | SCN5A   | Sodium channel protein type 5 subunit alpha        | P34884 |
| 60 | MMP12   | Matrix metalloproteinase 12                        | P34960 |
| 61 | MMP2    | Matrix metalloproteinase 2                         | P08253 |
| 62 | MMP9    | Matrix metalloproteinase-9                         | P14780 |
| 63 | SIN3A   | Histone deacetylase complex subunit Sin3a          | Q60520 |
| 64 | STAT3   | Signal transducer and activator of transcription 3 | P40763 |
| 65 | TBXAS1  | Thromboxane-A synthase                             | P24557 |
| 66 | NCOA2   | Nuclear receptor coactivator 2                     | P15596 |
| 67 | NFKBIA  | NF-kappa-B inhibitor alpha                         | P25963 |
| 68 | NOS2    | Nitric oxide synthase, inducible                   | P35228 |
| 69 | NOX4    | NADPH oxidase 4                                    | Q5R5C5 |
| 70 | NR4A1   | Nuclear receptor subfamily 4 group A member 1      | P22736 |
| 71 | TLR4    | Toll-like receptor 4                               | Q9QUK6 |
| 72 | TRAF1   | TNF receptor-associated factor 1                   | P39428 |
| 73 | PDE5A   | Phosphodiesterase 5A                               | O76074 |
| 74 | PKN1    | Protein kinase N1                                  | P70268 |
| 75 | PLA2G1B | Phospholipase B1                                   | P04054 |
| 76 | PLA2G2A | Phospholipase A2                                   | P14555 |
| 77 | P2RY12  | P2Y purinoceptor 12                                | P70496 |
| 78 | P2RY2   | P2Y purinoceptor 2                                 | P00747 |
| 79 | PPARG   | Peroxisome proliferator-activated receptor gamma   | P37231 |
| 80 | PRKCA   | Protein kinase C alpha type                        | P17252 |
| 81 | PRKCE   | Protein kinase C epsilon type                      | P16054 |
| 82 | PRSS1   | Serine Protease 1                                  | P07477 |
| 83 | PRTN3   | Proteinase 3                                       | P24158 |
| 84 | PTGER2  | Prostaglandin E2 receptor EP2 subtype              | P43116 |
| 85 | PTGES   | Prostaglandin E synthase                           | O14684 |
| 86 | PTGS1   | Prostaglandin G/H synthase 1                       | P23219 |
| 87 | PTGS2   | Prostaglandin G/H synthase 2                       | P35354 |
| 88 | QARS    | Glutamine--tRNA ligase                             | P47897 |
| 89 | RNASE1  | Ribonuclease pancreatic                            | P07998 |
| 90 | RNASE3  | Ribonuclease A Family Member 3                     | P12724 |
| 91 | SCN2A   | Sodium channel protein type 2 subunit alpha        | P04775 |
| 92 | SELE    | Selectin E                                         | P16581 |
| 93 | SELP    | Selectin P                                         | P25236 |

---

|    |          |                                      |        |
|----|----------|--------------------------------------|--------|
| 94 | SERPINB2 | Serpin family B member 2             | P05120 |
| 95 | TNF      | Tumor necrosis factor                | P01375 |
| 96 | VEGFA    | Vascular endothelial growth factor A | P15692 |
| 97 | XDH      | Xanthine dehydrogenase/oxidase       | P47989 |

56

57

58 **Tab. S2** The 29 potential anti inflammation compounds from FCI and their targets

| NO. | Compound                                  | Target                                                                                                                                                          |
|-----|-------------------------------------------|-----------------------------------------------------------------------------------------------------------------------------------------------------------------|
| 1   | Quinic acid                               | PTGER2, PTGES, LTA4H, PRKCA, TRPM8                                                                                                                              |
| 3   | 5-Caffeoylquinic acid                     | PRKCA, INSR, PDE5A, NR4A1, SELE                                                                                                                                 |
| 4   | Caffeic acid                              | PTGS1, PTGS2, ADRB2                                                                                                                                             |
| 5   | Chlorogenic acid                          | PRKCA, INSR, ADORA2B, NR4A1, SELE                                                                                                                               |
| 6   | 4-Caffeoylquinic acid                     | PRKCA, INSR, PDE5A, NR4A1, SELE                                                                                                                                 |
| 8   | Eriodictyol-7- <i>O</i> -glucoside        | TNF, ADORA1, ADORA3, VEGFA                                                                                                                                      |
| 9   | Rutin                                     | TNF, PDE5A, DNMT3B, CA1, SELP, DLG4, P2RY12, RNASE2, RNASE1, MPO, ALOX15                                                                                        |
| 10  | Isoquercitrin                             | CA2, CA12, CA4, NOX4, PTGS2, CD38, PDE5A, TNF, IL2, ADORA1, ALOX5, ADORA3, ABCG2, CYP1B1, CA1, ALOX15, MMP9, MMP2                                               |
| 11  | Luteolin-7- <i>O</i> - $\beta$ -glucoside | TNF, IL2, PDE5A, P2RY2, MAPK14, PLA2G2A                                                                                                                         |
| 12  | Luteolin-7- <i>O</i> -glucuronide         | TNF, IL2, PRKCA, PLA2G2A, ADORA3                                                                                                                                |
| 13  | 3, 4-Dicaffeoylquinic acid                | PRKCA, SELE, PDE5A, ADORA3                                                                                                                                      |
| 14  | Robinin                                   | QARS, PDE5A, ADORA3, VEGFA, PRKCA                                                                                                                               |
| 15  | 3, 5-Dicaffeoylquinic acid                | PRKCA, SELE, PDE5A, ADORA3                                                                                                                                      |
| 16  | Quercitrin                                | PDE5A, ADORA1, ADORA3, P2RY2, MAG, MPO, ALOX15, PTGER2, PTGES, PRKCA                                                                                            |
| 17  | Apigenin-7- <i>O</i> - $\beta$ -glucoside | TNF, IL2, ADORA1, PRKCA, ADORA3, PDE5A, FGFR1, TNF, IL2, PRKCA, ADORA3, MAPK14, PDE5A                                                                           |
| 19  | Diosmetin-7- <i>O</i> -glucuronide        | PDE5A, P2RY2, ITPR1, MAPK14                                                                                                                                     |
| 20  | 4, 5-Dicaffeoylquinic acid                | AKR1B10, PRKCA, PDE5A                                                                                                                                           |
| 23  | Quercetin                                 | PDE5A, ADORA1, ADORA3, P2RY2, MAG, AR, MMP9, MMP2, CA4, MMP12, CD38, CYP1B1, MPO, ALOX15                                                                        |
| 24  | Luteolin                                  | NOX4, XDH, MAOA, ALOX5, GLO1, TTR, AKR1B10, ALOX15, NFKBIA, PKN1, BACE1, PLG, AR, MMP9, MMP2, CA4, MMP12, CD38, CYP1B1, ABCG2, SERPINB2, ADORA2A, PDE4D, PDE9A, |

|    |                                                           |                                                                                                   |
|----|-----------------------------------------------------------|---------------------------------------------------------------------------------------------------|
|    |                                                           | XDH                                                                                               |
| 26 | Isorhamnetin                                              | HDAC1, AMPD3, SLC5A4, CDK6, MMP9<br>SCN4A, SCN2A, ALOX15, PTGS2,                                  |
| 28 | Linarin                                                   | NFKBIA, TNF, ADORA1, IL2, CA2,<br>PRKCA, ADORA3, PRKCD, PRKCE<br>PDE5A, PTGS1, PTGS2              |
| 30 | Quercetin-3- <i>O</i> -glucuronide-7- <i>O</i> -glucoside | PDE5A, ADORA1, ADORA3, P2RY2,<br>MAG, MPO                                                         |
| 31 | Kaempferol                                                | MAOA, ALOX5, GLO1, AKR1B10,<br>ALOX15, NFKBIA, PKN1, BACE1, PLG,<br>CA4, MMP12, CD38, CYP1B, PIM1 |
| 32 | Apigenin                                                  | PTGS1, PTGS2, TNF, NFKBIA, ODC1,<br>IKBKG, ADORA3, ALOX15, INSR                                   |
| 35 | Diosmetin                                                 | TNF, F3, SCN5A, SCN4A, SCN2A, PDE5A                                                               |
| 36 | Tricin                                                    | PLA2G2A, ALOX15                                                                                   |
| 39 | Jaceosidin                                                | NOS2, PPARG, PTGS2, MAPK14, NCOA2,<br>PLA2G2A, ADORA3, ALOX15, MPO,<br>PLG, MMP9                  |
| 41 | Acacetin                                                  | NOS2, PTGS1, PTGS2, ADRB2, FASLG,<br>ALOX15, ALOX12, ADORA3, PLA2G2A                              |
| 42 | Eupatilin                                                 | NOS2, PPARG, PTGS2, MAPK14, PTGS1,<br>PLA2G2A, ADORA3, PLG, ALOX15,<br>MMP9                       |

---

59  
60  
61  
62  
63  
64  
65  
66  
67  
68  
69  
70  
71  
72  
73  
74  
75  
76  
77  
78  
79

**Tab. S3** Relative peak area of the 42 compounds in UPLC-Q-TOF/MS of FCI

| No.       | Identification                                                                                                                                 | Relative peak area | Percentage of total peak area |
|-----------|------------------------------------------------------------------------------------------------------------------------------------------------|--------------------|-------------------------------|
| 1         | Quinic acid                                                                                                                                    | 583                | 0.03                          |
| 2         | Maleic acid                                                                                                                                    | 731                | 0.04                          |
| <b>3</b>  | <b>5-Caffeoylquinic acid</b>                                                                                                                   | 9431               | 1.03                          |
| <b>4</b>  | <b>Caffeic acid</b>                                                                                                                            | 11412              | 1.22                          |
| <b>5</b>  | <b>Chlorogenic acid</b>                                                                                                                        | 158090             | 8.92                          |
| 6         | 4-Caffeoylquinic acid                                                                                                                          | 46351              | 2.61                          |
| 7         | Luteolin-7- <i>O</i> -rutinoside                                                                                                               | 8648               | 0.49                          |
| 8         | Eriodicyol-7- <i>O</i> -glucoside                                                                                                              | 5531               | 0.31                          |
| 9         | Rutin                                                                                                                                          | 1792               | 0.10                          |
| 10        | Isoquercitrin                                                                                                                                  | 2937               | 0.17                          |
| <b>11</b> | <b>Luteolin-7-<i>O</i>-<math>\beta</math>-D-glucoside</b>                                                                                      | 49495              | 2.79                          |
| 12        | Luteolin-7- <i>O</i> -glucuronide                                                                                                              | 19527              | 1.10                          |
| <b>13</b> | <b>3,4-Dicaffeoylquinic acid</b>                                                                                                               | 42073              | 2.37                          |
| 14        | Robinin                                                                                                                                        | 352                | 0.02                          |
| <b>15</b> | <b>3,5-Dicaffeoylquinic acid</b>                                                                                                               | 337800             | 19.06                         |
| 16        | Quercitrin                                                                                                                                     | 527                | 0.03                          |
| <b>17</b> | <b>Apigenin-7-<i>O</i>-<math>\beta</math>-D-glucoside</b>                                                                                      | 43242              | 2.44                          |
| 18        | Apigenin-7- <i>O</i> -rutinoside                                                                                                               | 1792               | 0.10                          |
| 19        | Diosmetin-7- <i>O</i> -glucuronide                                                                                                             | 529                | 0.03                          |
| <b>20</b> | <b>4,5-Dicaffeoylquinic acid</b>                                                                                                               | 133169             | 7.51                          |
| 21        | Apigenin-7- <i>O</i> -(6"- <i>O</i> -acetyl)- $\beta$ -D-glucoside                                                                             | 579                | 0.03                          |
| 22        | Diosmetin-7- <i>O</i> -rutinoside                                                                                                              | 2971               | 0.17                          |
| 23        | Quercetin                                                                                                                                      | 672                | 0.04                          |
| <b>24</b> | <b>Luteolin</b>                                                                                                                                | 133196             | 7.51                          |
| 25        | Acacetin-7- <i>O</i> -(6"- <i>O</i> - $\alpha$ -L-rhamnopyranosyl)- $\beta$ -sophoroside                                                       | 1724               | 0.10                          |
| 26        | Isorhamnetin                                                                                                                                   | 5741               | 0.32                          |
| 27        | Eupatolitin                                                                                                                                    | 5258               | 0.30                          |
| <b>28</b> | <b>Linarin</b>                                                                                                                                 | 223559             | 12.61                         |
| 29        | 5, 7-Dihydroxy-4'-methoxyisoflavone                                                                                                            | 5713               | 0.32                          |
| 30        | Quercetin-3- <i>O</i> -glucuronide-7- <i>O</i> -glucoside                                                                                      | 295                | 0.02                          |
| 31        | Kaempferol                                                                                                                                     | 714                | 0.04                          |
| <b>32</b> | <b>Apigenin</b>                                                                                                                                | 110652             | 6.24                          |
| 33        | Acacetin-7- <i>O</i> - $\beta$ -D-rhamnopyranosyl-(1 $\rightarrow$ 6)-[2- <i>O</i> -acetyl-glucopyranosyl (1 $\rightarrow$ 2)]-glucopyranoside | 791                | 0.04                          |
| 34        | Chrysoeriol                                                                                                                                    | 5912               | 0.33                          |
| 35        | Diosmetin                                                                                                                                      | 5741               | 0.32                          |
| 36        | Tricin                                                                                                                                         | 786                | 0.04                          |
| 37        | 5, 3', 4'-Trihydroxy-6, 7-dimethoxyflavone                                                                                                     | 1621               | 0.09                          |
| 38        | 5, 7, 3'-Trihydroxy-6, 4', 5'-trimethoxyflavone                                                                                                | 279                | 0.02                          |
| <b>39</b> | <b>Jaceosidin</b>                                                                                                                              | 26315              | 2.16                          |



|    |           |       |      |
|----|-----------|-------|------|
| 40 | Handelin  | 15795 | 0.89 |
| 41 | Acacetin  | 87599 | 3.94 |
| 42 | Eupatilin | 68896 | 2.89 |

---

**Tab. S4** The protein-protein interaction of 87 targets acted by 14 key constituents of FCI

| No. | Target<br>(Node 1) | Related target<br>(Node 2)                                                                                                             |
|-----|--------------------|----------------------------------------------------------------------------------------------------------------------------------------|
| 1   | ABCG2              | -                                                                                                                                      |
| 2   | ADA                | -                                                                                                                                      |
| 4   | ADORA1             | P2RY12, IL6                                                                                                                            |
| 5   | ADORA2A            | ADRB2, PTGER2, ADORA2B, USP4, ADORA1                                                                                                   |
| 6   | ADORA2B            | PTGER2, IL6, ALOX12                                                                                                                    |
| 7   | ADORA3             | P2RY12, ADORA1, MMP2                                                                                                                   |
| 8   | ADRB2              | PTGER2, ADORA2B, INSR                                                                                                                  |
| 9   | AKR1B10            | ADORA1                                                                                                                                 |
| 10  | ALOX12             | SRD5A1, MMP2, MAPK14, PTGES<br>ALOX12, IL6, PTGES, ADRB2, MMP2, PPARG, ODC1, EGFR,                                                     |
| 11  | ALOX15             | STAT3, FLT1, MMP2, MAPK14, KDR, CCND1, PPARG, CMA1,<br>F2R, NOX4, PTGES, NFKBIA<br>IL6, PTGS1, LTA4H, PTGES, ADRB2, MMP2, PPARG, ODC1, |
| 12  | ALOX5              | MAPK14, KDR, CCND1, PPARG, CMA1, F2R, NOX4, PTGES,<br>NFKBIA                                                                           |
| 13  | AMPD3              | -                                                                                                                                      |
| 14  | APOH               | -                                                                                                                                      |
| 16  | BACE1              | MMP2                                                                                                                                   |
| 17  | CCND1              | MMP2, NFKBIA                                                                                                                           |
| 18  | CCND3              | CDK6, PPARG, CCND1, STAT3, EGFR                                                                                                        |
| 19  | CDK6               | CCND1, STAT3, NFKBIA, MAPK14                                                                                                           |
| 20  | CDKN2A             | CCND1, CDK6, CCND3, MAPK14, VEGFA, MMP2, HDAC1,<br>RELA                                                                                |
| 21  | CMA1               | MMP2                                                                                                                                   |
| 22  | COL1A1             | NFKBIA                                                                                                                                 |
| 23  | CSNK2A1            | MMP2                                                                                                                                   |
| 24  | CTSG               | -                                                                                                                                      |
| 25  | DLG4               | GRIN2B, FLT1, KDR                                                                                                                      |
| 26  | DNMT1              | DNMT3B, STAT3, IL6, KDR                                                                                                                |
| 27  | DOT1L              | HDAC1                                                                                                                                  |
| 28  | EGFR               | STAT3, CCND1, IL6, MAPK14, MMP2, KDR, ABCG2, NFKBIA                                                                                    |
| 30  | EPX                | -                                                                                                                                      |
| 31  | ESR1               | -                                                                                                                                      |
| 32  | F2R                | P2RY2, CCND1, PRSS1, SELP, MMP2, IL6, EGFR                                                                                             |
| 33  | F3                 | -                                                                                                                                      |
| 34  | FASLG              | PRKCQ, PRKCE, MAPK14                                                                                                                   |
| 35  | FGF2               | -                                                                                                                                      |
| 36  | FGFR1              | VEGFA, CCND1, IRS1, STAT3, MMP2, MMP9, MAPK14                                                                                          |
| 37  | FLT1               | STAT3, MMP2, EGFR, CCND1, MAPK14                                                                                                       |
| 38  | GLO1               | AKR1B10                                                                                                                                |
| 39  | GRIN2B             | SIN3A                                                                                                                                  |

|    |         |                                                                                                                |
|----|---------|----------------------------------------------------------------------------------------------------------------|
| 40 | HDAC1   | DNMT3B, DNMT1, CSNK2A1, CCND1, NFKBIA, STAT3, CDK6, CCND3, PPARG, MAPK14, EGFR                                 |
| 41 | IKBKB   | NFKBIA, PRKCQ, EGFR, PRKCE, MAPK14, NFKBIA, SELP, GRIN2B, KDR, DLG4, IL6                                       |
| 42 | IL10    | IL6, STAT3, MMP9, VEGFA, MMP2, MAPK14                                                                          |
| 43 | IL2     | -                                                                                                              |
| 44 | IL6     | MMP2, CCND1, MAPK14, CD38, NFKBIA, CMA1, IL10, STAT3, MMP9, VEGFA, MMP2, MAPK14, TLR4, PPARG, EGFR, RELA, NOS2 |
| 45 | INSR    | PPARG, STAT3, IL6, PRKCQ, DLG4, CCND1                                                                          |
| 46 | P2RY12  | -                                                                                                              |
| 47 | P2RY2   | -                                                                                                              |
| 48 | IRS1    | INSR, EGFR, IL6, STAT3, KDR, FLT1, PPARG, PRKCQ, CCND1, MAPK14                                                 |
| 49 | PRKCD   | -                                                                                                              |
| 50 | ITGAM   | -                                                                                                              |
| 51 | ITPR1   | IL6, MMP2                                                                                                      |
| 52 | KDR     | CCND1, ABCG2, MAPK14                                                                                           |
| 55 | MAG     | -                                                                                                              |
| 56 | MAOA    | GLO1, AKR1B10, HDAC1                                                                                           |
| 57 | MAPK14  | NFKBIA, CCND1, MMP2, CSNK2A1                                                                                   |
| 60 | MMP12   | -                                                                                                              |
| 61 | MMP2    | -                                                                                                              |
| 62 | MMP9    | VEGFA, IL6, EGFR, STAT3, FLT1, MMP2, MAPK14                                                                    |
| 63 | SIN3A   | CCND1, IL6, MAPK14, MMP2, NFKBIA, PRKCQ, KDR                                                                   |
| 64 | STAT3   | PTGES, PTGS1, ALOX5                                                                                            |
| 65 | TBXAS1  | IL6, EGFR, NOX4, IKBKG, STAT3, MMP9, NOS2                                                                      |
| 66 | NCOA2   | AR, PPARG, CCND3, PKN1, SIN3A, IL6, MAPK14, NR4A1, ESRRA                                                       |
| 67 | NFKBIA  | IKBKB, IKBKG, IRAK1, REL, RELA, TNF, BTRC, CHUK                                                                |
| 68 | NOS2    | MAPK14, NFKBIA, SELP, GRIN2B, KDR, DLG4, IL6                                                                   |
| 69 | NOX4    | MAPK14, MMP2                                                                                                   |
| 70 | NR4A1   | PPARG, ESRRA, PTGER2, STAT3                                                                                    |
| 71 | TLR4    | VEGFA, MMP2, INSR, IRS1, PTGES                                                                                 |
| 72 | TRAF1   | NFKBIA, PKN1, IKBKG, CCND1, IL6                                                                                |
| 73 | PDE5A   | ITPR1                                                                                                          |
| 74 | PKN1    | PRKCE, MAPK14                                                                                                  |
| 76 | PLA2G2A | ALOX12, PTGS1, ALOX15, ALOX5, PTGES, IL6                                                                       |
| 77 | P2RY12  | IL6, SELP, ADORA2B                                                                                             |
| 78 | P2RY2   | ADRB2, EGFR, IL6, KDR, ADORA1                                                                                  |
| 79 | PPARG   | ESRRA, NOX4, ABCG2, IL6, CCND1, STAT3, EGFR, MMP2, MAPK14, KDR                                                 |
| 80 | PRKCA   | EGFR, NFKBIA, PRKCE, RELA, GRIN2B, PRKCD, ITPR1, IL6, PPARG, CD38, DLG4, INSR                                  |

|    |          |                                                                                                                                                                                              |
|----|----------|----------------------------------------------------------------------------------------------------------------------------------------------------------------------------------------------|
| 81 | PRKCD    | MAPK14                                                                                                                                                                                       |
| 82 | PRKCE    | EGFR, PTGER2, PPARG, IL6,                                                                                                                                                                    |
| 83 | PRKCQ    | PRKCQ, STAT3, IRS1, EGFR, MAPK14                                                                                                                                                             |
| 84 | PTGER2   | MAPK14                                                                                                                                                                                       |
| 85 | PTGES    | STAT3, IRS1, PRKCQ, NFKBIA, PRKCE, INSR, EGFR, ITPR1, ESRRA, ADRB2, MAPK14                                                                                                                   |
| 86 | PTGS1    | PTGES, ALOX12, ALOX15, PTGER2, STAT3, CSNK2A1, , NOS2, MAPK14, CDK6, SERPINB2, PTGS1, NFKBIA, PPARG, STAT3, MAPK14, CCND1, PPARG, IL6, TRAF1, NOS2, MMP9, CSNK2A1, TLR4, PRKCD, IKBKG, FASLG |
| 87 | PTGS2    | STAT3, MAPK14, CCND1, PPARG, IL6, TRAF1, NOS2, MMP9, CSNK2A1, TLR4, PRKCD, IKBKG, FASLG                                                                                                      |
| 88 | QARS     | HDAC1, NFKBIA                                                                                                                                                                                |
| 89 | RNASE1   | BACE1, AR, SIN3A, KDR, EGFR, FLT1                                                                                                                                                            |
| 92 | SELE     | SCN5A, DLG4, SCN2A                                                                                                                                                                           |
| 93 | SELP     | MMP2                                                                                                                                                                                         |
| 94 | SERPINB2 | DNMT3B, CSNK2A1, DNMT1, STAT3                                                                                                                                                                |
| 95 | TNF      | CCND1, EGFR, STAT3, CDK6, HDAC1, NR4A1, CCND3, MAPK14, PKN1, IL6, PPARG, ESRRA, VEGFA, INSR, DNMT1, FLT1, TRPM8, SRD5A1, SIN3A, MMP9, MMP2                                                   |
| 96 | VEGFA    | PRKCQ, STAT3, IRS1                                                                                                                                                                           |
| 97 | XDH      | ADRB2, KDR, FLT1, MMP2, EGFR, INSR, STAT3, IL6, PPARG, IRS1, DNMT1                                                                                                                           |

---

84 -: there is no correlation with other 86 targets.
